# Supplementary material for: Retinal de novo lipogenesis coordinates neurotrophic signaling to maintain vision
Source: PubMed Central journal article supplement (PMC5821215; doi:10.1172/jci.insight.97076), 2018-01-11
Supplement: jciinsight-3-97076-s001.pdf [file jciinsight-3-97076-s001.pdf]

**Figure S1**

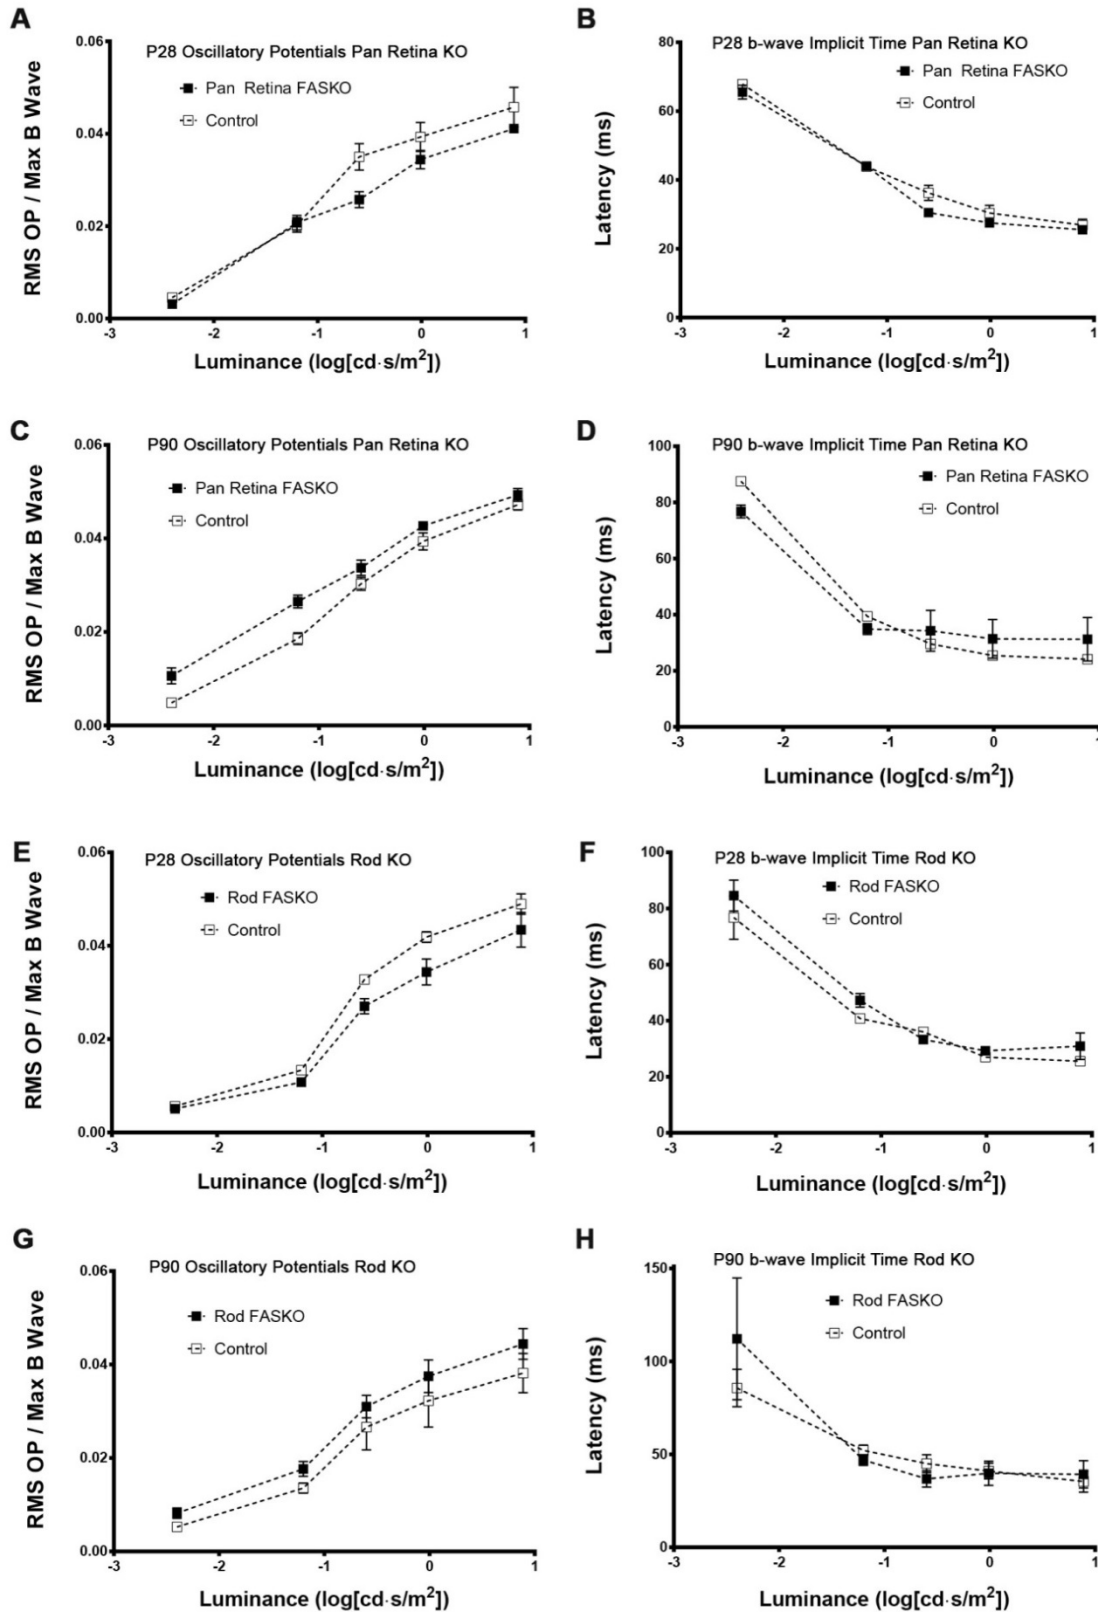

**Supplemental Figure 1. Additional electroretinographic properties of FASKO animals.** (A, C) Scotopic oscillatory potentials (OP) in P28 (A) and P90 (C) animals with panretinal FAS deletion, represented as the root mean square (RMS) of their amplitudes normalized to the maximal b-wave amplitude (n=8-10 animals/group, two-way ANOVA). (B, D) Implicit times of the scotopic b-waves in pan-retina FAS KO animals at P28 (B) and P90 (D) (n=8-10 animals/group, two-way ANOVA). (E, G) Scotopic OPs in rod FASKO at P28 (E) and P90 (G) (n=6 animals/group, two-way ANOVA). (F, H) Implicit times of scotopic b-waves in rod FASKO at P28 (F) and P90 (H) (n=6 animals/group, two-way ANOVA). *P*<0.05 was considered significant.

Figure S2

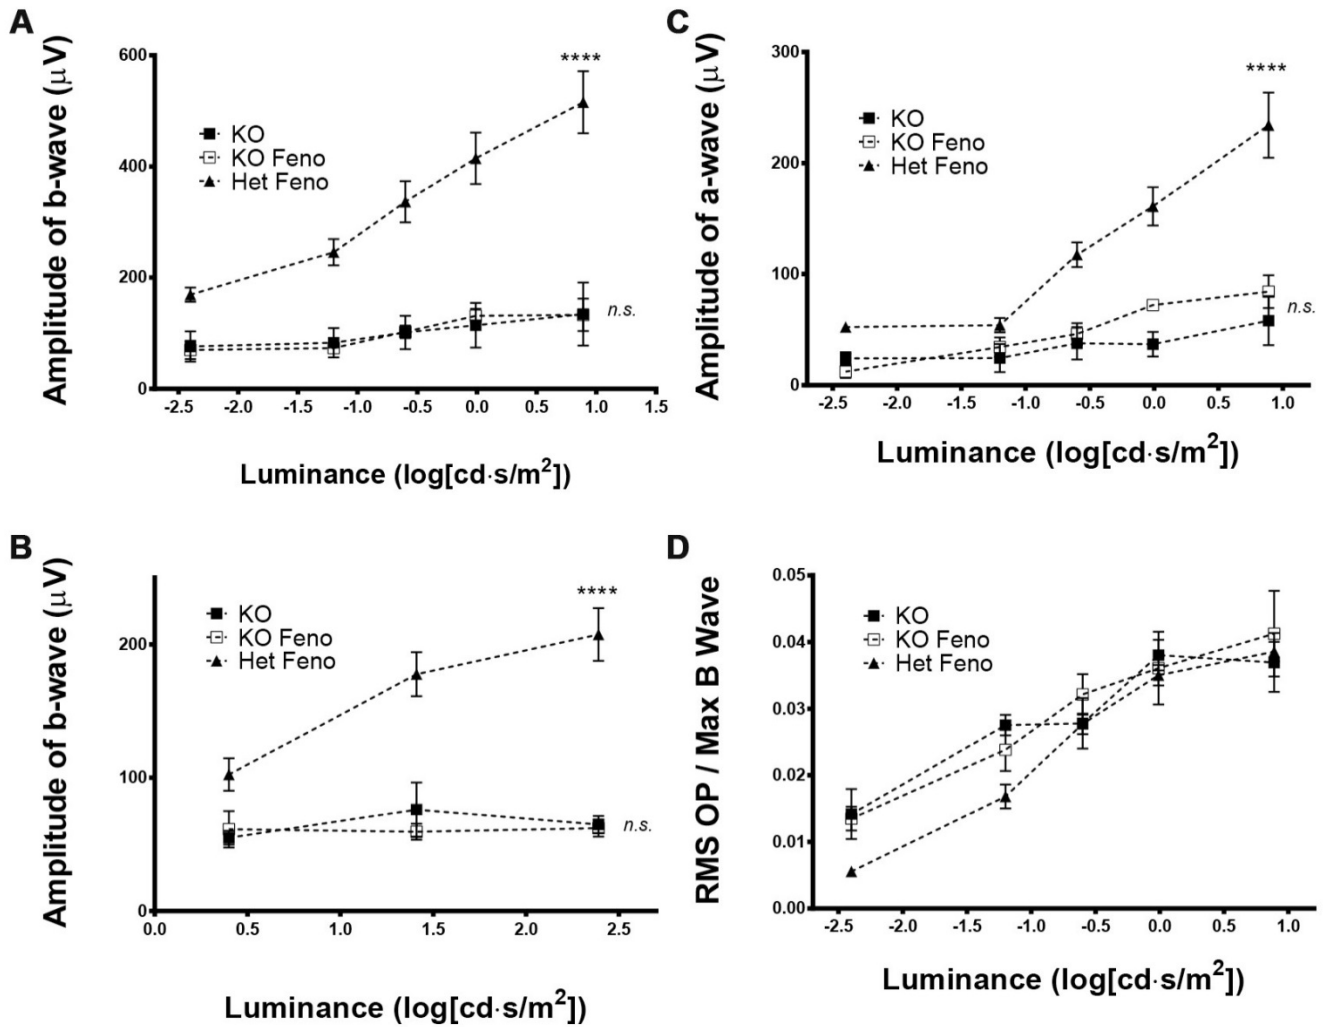

**Supplemental Figure 2. Electroretinography in FASKO after chronic fenofibrate feeding.** (A, C) dark-adapted b-waves and a-waves in P60 pan-retina FASKO (KO Fen) or heterozygous controls (Het Fen) after 5 weeks of feeding with 0.2% (w/w) fenofibrate-supplemented diet or standard chow (KO). (B, D) Photopic b-waves (B) and scotopic OPs (D) after fenofibrate feeding. For all experiments, n=4 animals in KO group, 10 animals in KO Fen group, and 14 animals in Het Fen group. \*\*\*\* indicates P<0.0001 (Two-way ANOVA).

**Figure S3**

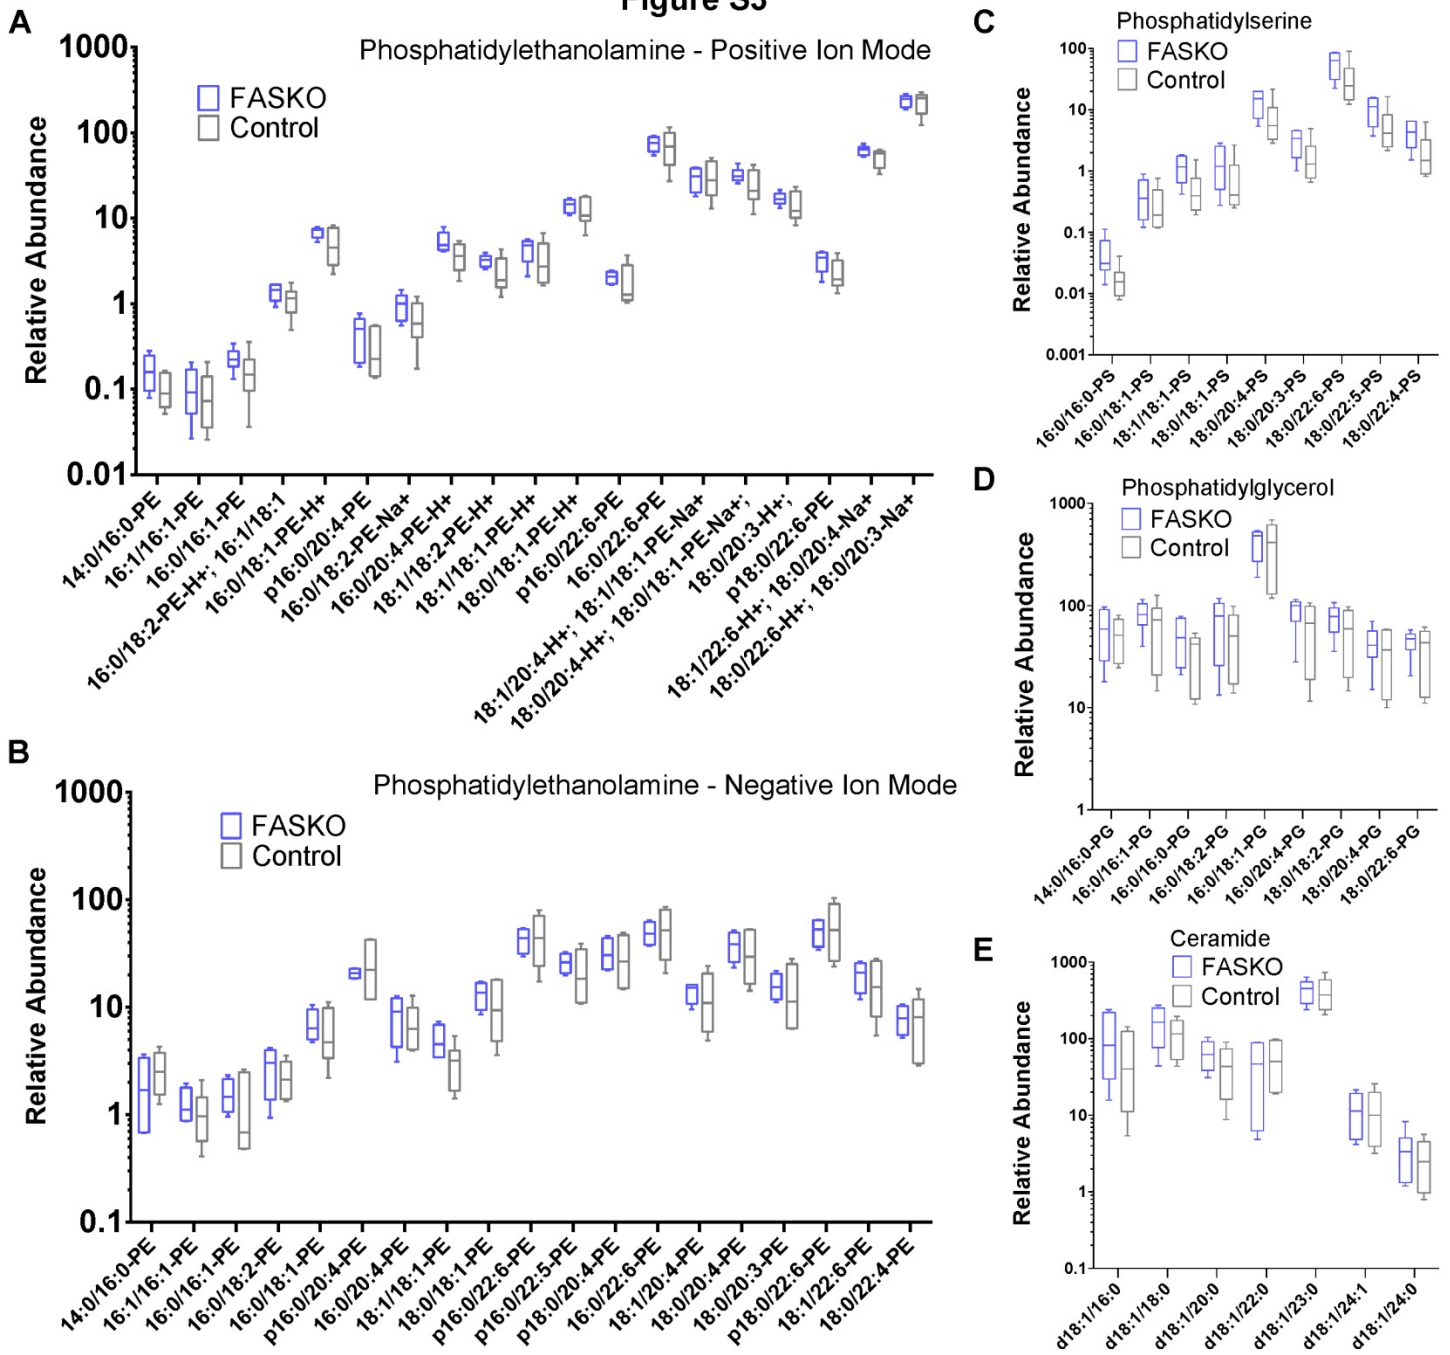

**Supplemental Figure 3. Phospholipid profiling of whole retinal FASKO membranes at P28. (A, B)** Quantitation of phosphatidylethanolamines detected by positive (A) and negative (B) ion mode LC-ESI-MS. **(C, D, E)** Whole retinal lipid profiles for phosphatidylserines (C), phosphatidylglycerols (D) and ceramides (E). For all experiments, n=6 animals/group, analyses by t-test.  $P < 0.05$  was considered significant.

Figure S4

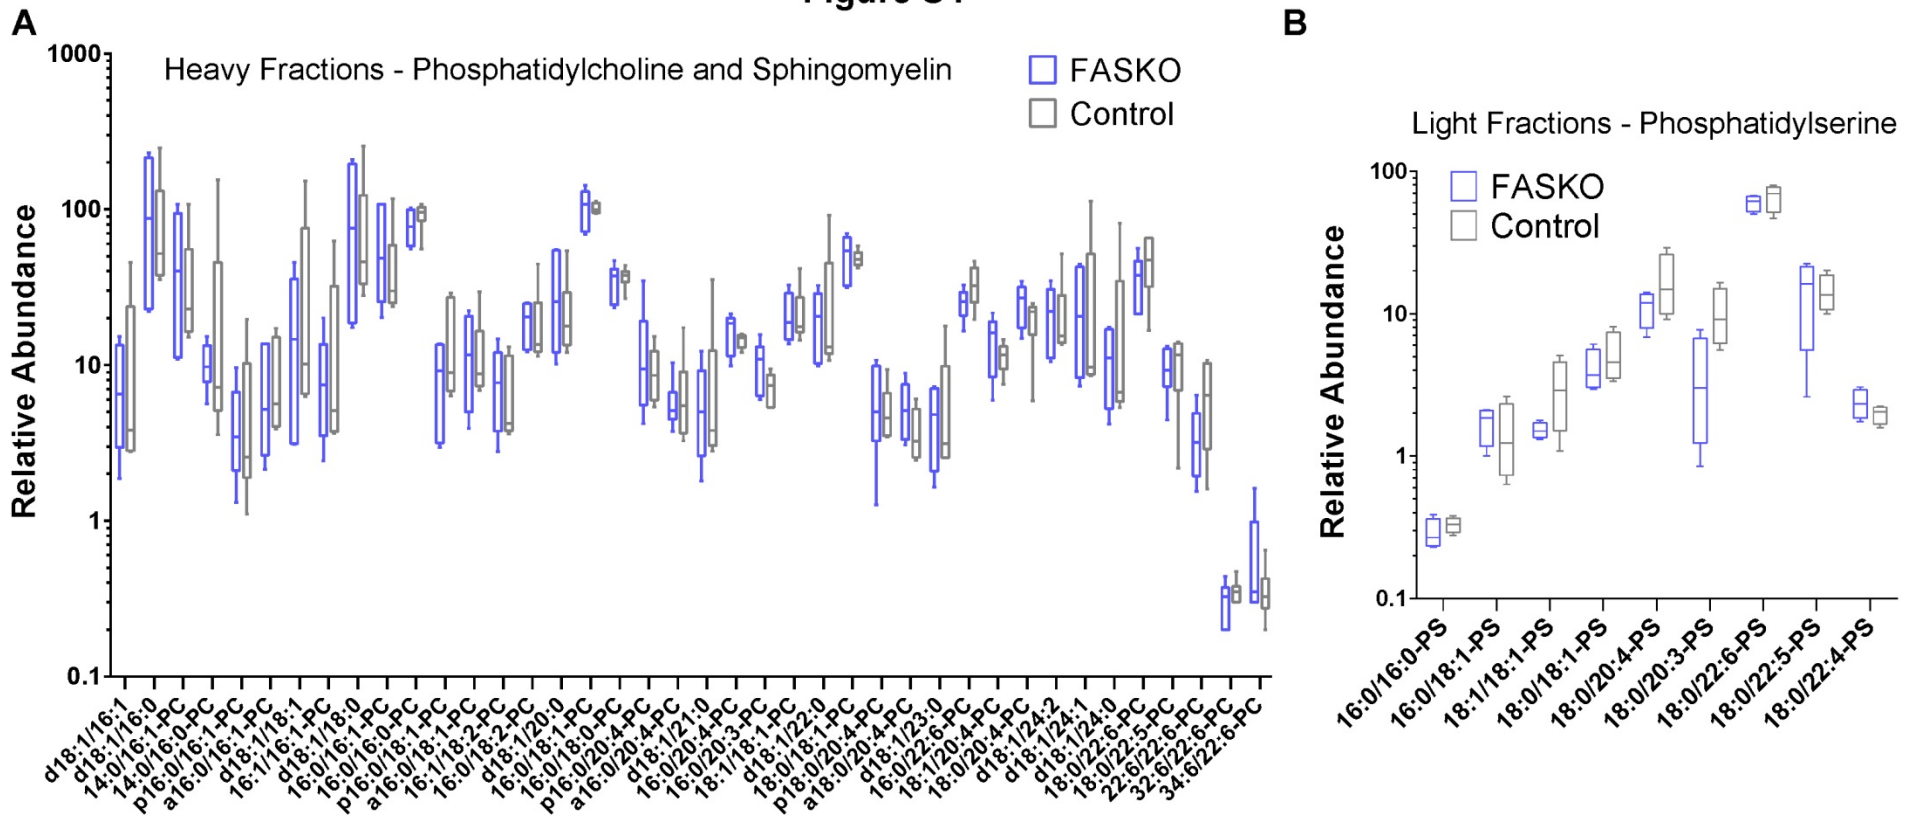

**Supplemental Figure 4. Additional lipid analysis in P28 FASKO.** (A) Phosphatidylcholine and sphingomyelin species detected in heavy membrane fractions. (B) Phosphatidylserine quantification from light membrane fractions. For all experiments, n=6 animals/group, analyses by t-test,  $P < 0.05$  was considered significant.

**Figure S5**

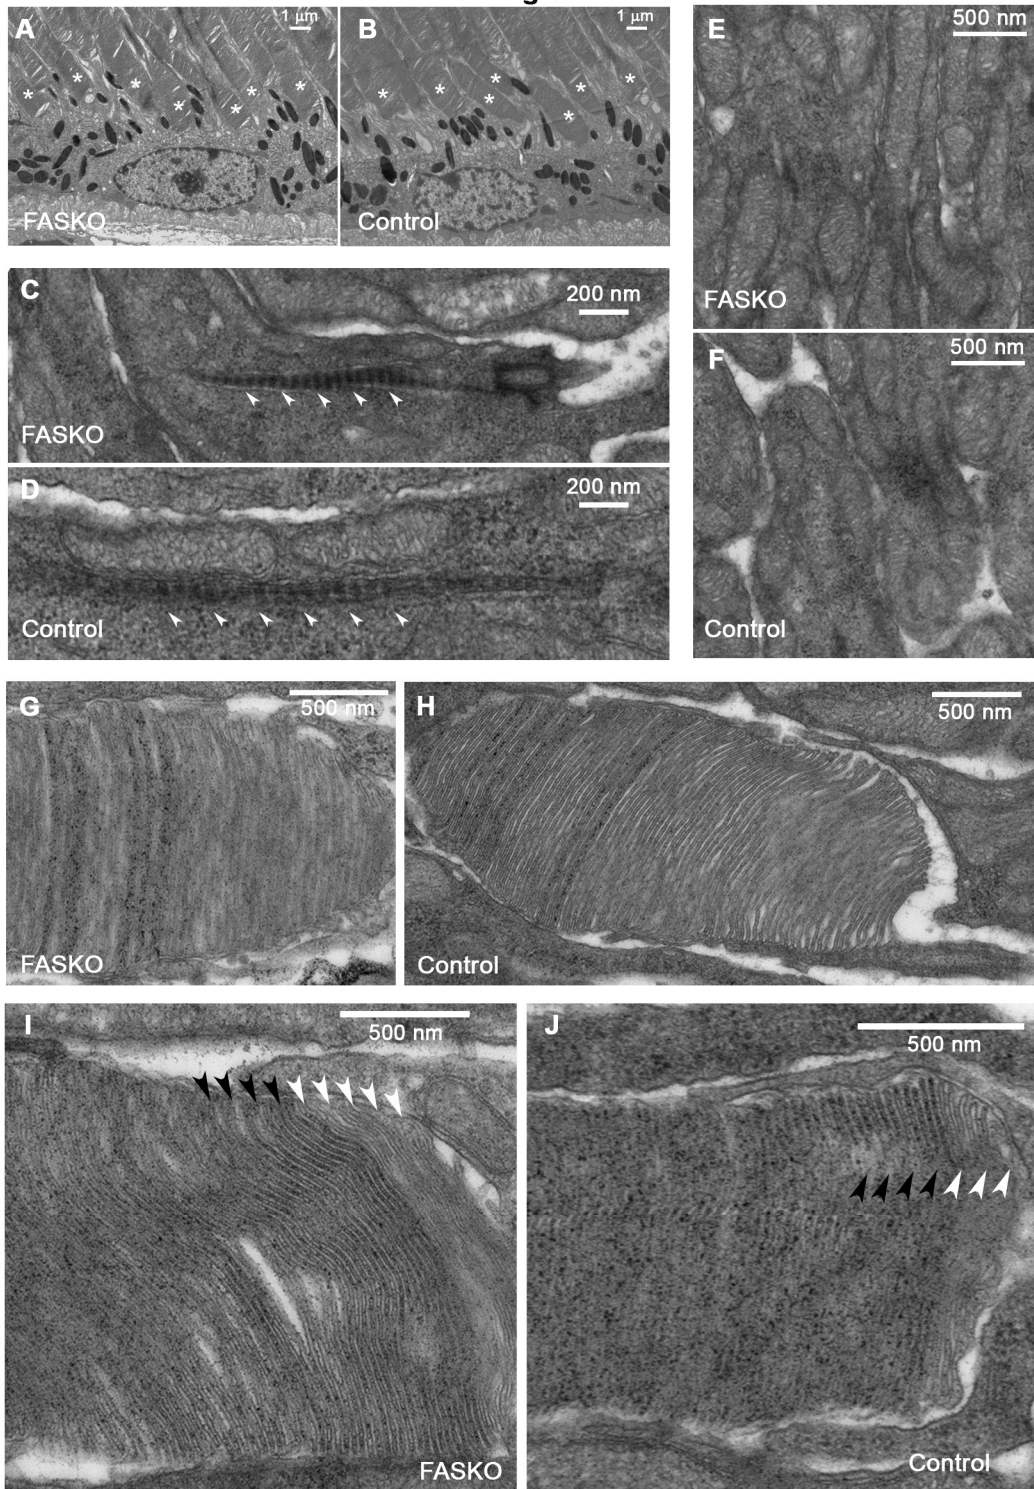

**Supplemental Figure 5. Intact ultrastructural morphology in FAS-deficient retina at P28. (A, B)** Transmission electron microscopy demonstrating intact rod photoreceptor outer segment structure (asterisks) and interdigitation with the underlying retinal pigment epithelium in FAS mutants (A) and controls (B). **(C)** Normal appearing rootlet structures in FASKO rods. **(D)** Rootlet structures in controls. **(E, F)** Mitochondrial morphology in FASKO rods (E) and littermate control rods (F). **(G-J)** Photoreceptor outer segment detail in FASKO cones (G), control cones (H), FASKO rods (I), and control rods (J). Images are representative of experiments with n=2 for controls and n=5 for FASKO.
